# Supplementary material for: Primary microRNA processing is functionally coupled to RNAP II transcription in vitro
Source: PubMed Central journal article supplement (PMC4493704; doi:10.1038/srep11992), 2015-07-07
Supplement: srep11992-s1.pdf [file srep11992-s1.pdf]

## **Supplementary Information**

**Title:**

Primary microRNA processing is functionally coupled to RNAP II transcription in vitro

**Authors:**

Shanye Yin, Yong Yu and Robin Reed

## Supplementary Information

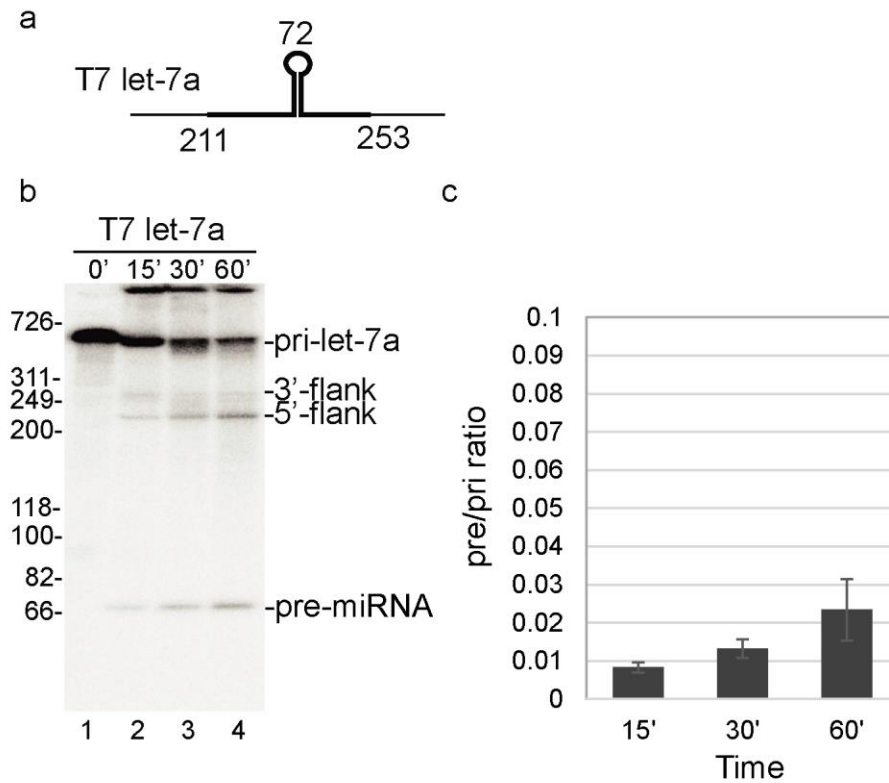

**Supplementary Figure S1. Pri-miRNA processing of naked T7 let-7a pri-miRNA in vitro.** (a) Schematic showing the T7 let-7a pri-miRNA transcript used for in vitro processing. (b) T7 let-7a pri-miRNA was incubated with nuclear extract in the presence of 6.4 mM MgCl<sub>2</sub> for the indicated times. Total RNA was isolated, run on an 8% denaturing polyacrylamide gel, and bands detected by phosphorimager. (c) The percentage of T7 let-7a pri-miRNA processed at each time point in panel C was determined as the amount of pre-let-7a relative to pri-mRNA at the start of the reaction. RNAs were detected by phosphorimager and quantified using Quantity One software. Mean  $\pm$  S.D. of three biological replicates are shown.

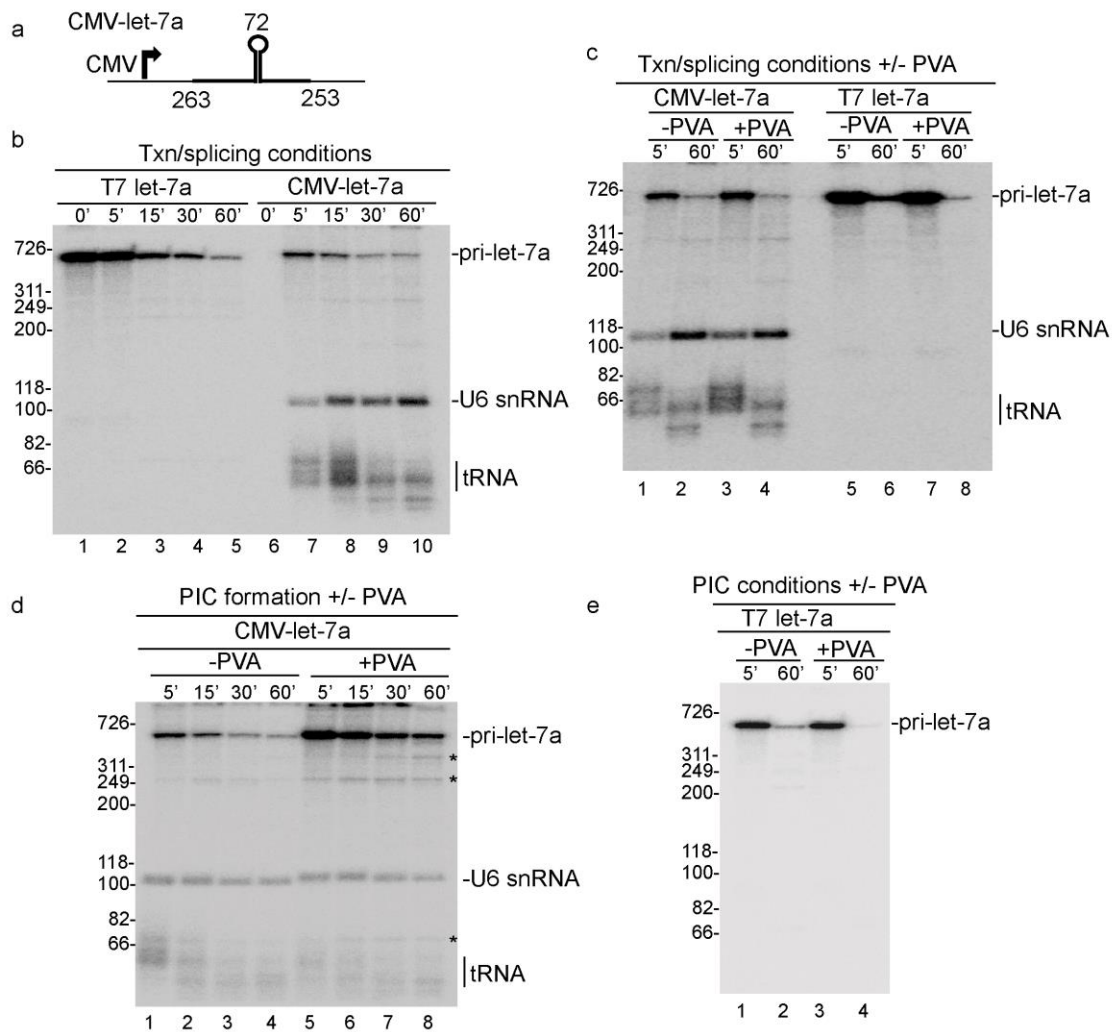

### Supplementary Figure S2. Optimization of RNAP II txn/pri-miRNA

#### processing conditions. (a) Structure of the DNA template encoding CMV-let-7a

pri-miRNA used to optimize RNAP II transcription and pri-miRNA processing.

The sizes of the 5' flank, pre-miRNA, and 3' flank are shown. (b) T7 let-7a pri-

miRNA or CMV DNA template encoding let-7a pri-miRNA was incubated with

nuclear extract under txn/splicing conditions (with 3.2 mM MgCl<sub>2</sub>), for the

indicated times. Total RNA was isolated and run on an 8% denaturing



**Supplementary Figure S3. Coupled txn/pri-miRNA processing using two different miRNAs.** (a, b) CMV DNA templates encoding miR-21 pri-miRNA (a) or encoding miR-26 (b) pri-miRNA or the corresponding T7 transcripts were incubated in nuclear extracts in the txn/pri-miRNA processing system for the indicated times. Total RNA was isolated and fractionated on an 8% denaturing polyacrylamide gel. The RNA species are labeled and ori indicates the gel origin.
